# Supplementary material for: Complexation of the caesium cation by the host p-tert-butylcalix[6]arene hexaacetamide
Source: Royal Society of Chemistry journal article supplement (doi:10.1039/b307897n), 2003-01-01
Supplement: b307897n1.pdf [file b307897n1.pdf]

*Complexation of the cesium cation by the host p-tert-butyl-calix[6]arene-hexaacetamide.*

Urs C. Meier and Christian Detellier

Submitted for publication to J.C.S. Dalton Trans. On July 9, 2003

Supplementary crystallographic data, compound I

Table 2. Atomic coordinates ( $\times 10^4$ ) and equivalent isotropic displacement parameters ( $\text{Å}^2 \times 10^3$ ) for cd001. ( $\mathcal{I}$ )  
 $U(\text{eq})$  is defined as one third of the trace of the orthogonalized  $U_{ij}$  tensor.

|        | x        | y         | z        | U(eq)  |
|--------|----------|-----------|----------|--------|
| N(1)   | 7455(2)  | 9246(2)   | -7(1)    | 63(1)  |
| N(2)   | 4119(3)  | 9132(3)   | 1596(2)  | 109(2) |
| N(3)   | -191(2)  | 3605(2)   | 765(1)   | 58(1)  |
| O(1)   | 6033(2)  | 7457(2)   | -680(1)  | 46(1)  |
| O(2)   | 6081(2)  | 8613(2)   | 203(1)   | 70(1)  |
| O(3)   | 3064(1)  | 7743(2)   | 533(1)   | 45(1)  |
| O(4)   | 2780(2)  | 8314(2)   | 1552(1)  | 94(1)  |
| O(5)   | 2227(1)  | 4014(2)   | 1032(1)  | 42(1)  |
| O(6)   | 1083(2)  | 2855(2)   | 509(2)   | 100(1) |
| O(7)   | 895(3)   | 8061(4)   | 1608(2)  | 129(2) |
| C(1)   | 5432(1)  | 7612(1)   | -1116(1) | 38(1)  |
| C(2)   | 5706(1)  | 7491(1)   | -1652(1) | 40(1)  |
| C(3)   | 5082(1)  | 7640(2)   | -2083(1) | 46(1)  |
| C(4)   | 4184(1)  | 7911(2)   | -1978(1) | 50(1)  |
| C(5)   | 3911(1)  | 8032(2)   | -1442(1) | 48(1)  |
| C(6)   | 4535(1)  | 7883(2)   | -1011(1) | 41(1)  |
| C(7)   | 3490(3)  | 8077(3)   | -2453(2) | 73(1)  |
| C(8)   | 3964(6)  | 8757(8)   | -2876(4) | 115(4) |
| C(9)   | 3394(6)  | 7169(7)   | -2774(4) | 120(3) |
| C(10)  | 2572(6)  | 8469(10)  | -2285(3) | 134(5) |
| C(8')  | 3801(12) | 7902(17)  | -2986(8) | 115(4) |
| C(9')  | 2617(13) | 7404(15)  | -2372(8) | 120(3) |
| C(10') | 3107(12) | 9089(19)  | -2398(7) | 134(5) |
| C(11)  | 6804(2)  | 8078(3)   | -618(2)  | 54(1)  |
| C(12)  | 6740(2)  | 8675(2)   | -107(2)  | 52(1)  |
| C(13)  | 8231(4)  | 9344(5)   | -353(3)  | 118(3) |
| C(14)  | 8213(11) | 10102(8)  | -663(5)  | 118(3) |
| C(13') | 8231(4)  | 9344(5)   | -353(3)  | 118(3) |
| C(14') | 9066(10) | 9519(7)   | -271(5)  | 118(3) |
| C(15)  | 7457(3)  | 9812(3)   | 498(2)   | 82(2)  |
| C(16)  | 8041(4)  | 9378(5)   | 941(2)   | 125(2) |
| C(17)  | 4175(2)  | 7911(2)   | -433(1)  | 44(1)  |
| C(18)  | 3264(1)  | 6940(1)   | 238(1)   | 34(1)  |
| C(19)  | 3757(1)  | 6984(1)   | -242(1)  | 37(1)  |
| C(20)  | 3876(1)  | 6190(1)   | -555(1)  | 37(1)  |
| C(21)  | 3503(1)  | 5352(1)   | -388(1)  | 35(1)  |
| C(22)  | 3010(1)  | 5308(1)   | 92(1)    | 36(1)  |
| C(23)  | 2891(1)  | 6102(1)   | 405(1)   | 35(1)  |
| C(24)  | 3658(2)  | 4480(2)   | -752(1)  | 43(1)  |
| C(25)  | 4706(3)  | 4290(3)   | -782(2)  | 80(1)  |
| C(26)  | 3323(3)  | 4682(3)   | -1332(2) | 63(1)  |
| C(27)  | 3162(4)  | 3635(3)   | -553(2)  | 89(2)  |
| C(28)  | 3830(2)  | 8158(3)   | 817(2)   | 56(1)  |
| C(29)  | 3520(3)  | 8558(3)   | 1339(2)  | 62(1)  |
| C(30)  | 5041(4)  | 9400(4)   | 1392(2)  | 96(2)  |
| C(31)  | 5805(4)  | 8829(5)   | 1630(3)  | 115(2) |
| C(32)  | 3902(4)  | 9335(4)   | 2251(2)  | 74(2)  |
| C(33)  | 3529(6)  | 10135(5)  | 2255(4)  | 153(3) |
| C(32') | 3719(19) | 10024(16) | 1826(11) | 74(2)  |

|        |          |          |         |        |
|--------|----------|----------|---------|--------|
| C(33') | 3529(6)  | 10135(5) | 2255(4) | 153(3) |
| C(34)  | 2354(2)  | 6030(2)  | 939(1)  | 39(1)  |
| C(35)  | 2850(1)  | 5455(1)  | 1386(1) | 37(1)  |
| C(36)  | 3397(1)  | 5926(1)  | 1768(1) | 41(1)  |
| C(37)  | 3910(1)  | 5435(1)  | 2158(1) | 44(1)  |
| C(38)  | 3877(1)  | 4472(1)  | 2165(1) | 41(1)  |
| C(39)  | 3331(1)  | 4000(1)  | 1782(1) | 41(1)  |
| C(40)  | 2817(1)  | 4492(1)  | 1393(1) | 37(1)  |
| C(41)  | 4459(2)  | 5972(2)  | 2617(1) | 49(1)  |
| C(42)  | 4902(4)  | 6838(3)  | 2388(2) | 99(2)  |
| C(43)  | 5239(3)  | 5392(3)  | 2852(2) | 88(2)  |
| C(44)  | 3790(4)  | 6226(5)  | 3069(2) | 130(3) |
| C(45)  | 1303(2)  | 3944(3)  | 1221(1) | 49(1)  |
| C(46)  | 725(2)   | 3424(3)  | 802(2)  | 52(1)  |
| C(47)  | -643(3)  | 4367(4)  | 1052(3) | 107(2) |
| C(48)  | -599(5)  | 5284(5)  | 716(4)  | 158(3) |
| C(49)  | -769(3)  | 3087(3)  | 377(2)  | 72(1)  |
| C(50)  | -1213(4) | 2261(4)  | 608(3)  | 123(2) |
| C(51)  | 3329(2)  | 2927(2)  | 1790(1) | 42(1)  |
| C(52)  | 537(4)   | 7909(4)  | 1092(2) | 99(2)  |

---

Table 3. Bond lengths [Å] and angles [deg] for cd001.

---

|              |           |
|--------------|-----------|
| N(1)-C(12)   | 1.342(5)  |
| N(1)-C(13)   | 1.432(6)  |
| N(1)-C(15)   | 1.481(5)  |
| N(2)-C(29)   | 1.344(5)  |
| N(2)-C(32')  | 1.52(3)   |
| N(2)-C(30)   | 1.490(6)  |
| N(2)-C(32)   | 1.666(7)  |
| N(3)-C(46)   | 1.355(4)  |
| N(3)-C(49)   | 1.458(5)  |
| N(3)-C(47)   | 1.467(6)  |
| O(1)-C(1)    | 1.381(3)  |
| O(1)-C(11)   | 1.439(4)  |
| O(2)-C(12)   | 1.238(4)  |
| O(3)-C(18)   | 1.399(2)  |
| O(3)-C(28)   | 1.430(4)  |
| O(4)-C(29)   | 1.255(5)  |
| O(5)-C(40)   | 1.397(2)  |
| O(5)-C(45)   | 1.433(4)  |
| O(6)-C(46)   | 1.213(4)  |
| O(7)-C(52)   | 1.372(6)  |
| C(1)-C(2)    | 1.3900    |
| C(1)-C(6)    | 1.3900    |
| C(2)-C(3)    | 1.3900    |
| C(2)-C(51)#1 | 1.570(4)  |
| C(3)-C(4)    | 1.3900    |
| C(4)-C(5)    | 1.3900    |
| C(4)-C(7)    | 1.539(4)  |
| C(5)-C(6)    | 1.3900    |
| C(6)-C(17)   | 1.520(4)  |
| C(7)-C(8')   | 1.41(2)   |
| C(7)-C(10)   | 1.514(9)  |
| C(7)-C(9)    | 1.533(10) |
| C(7)-C(10')  | 1.57(2)   |
| C(7)-C(8)    | 1.594(9)  |
| C(7)-C(9')   | 1.612(18) |
| C(11)-C(12)  | 1.523(5)  |
| C(13)-C(14)  | 1.331(13) |
| C(15)-C(16)  | 1.498(8)  |
| C(17)-C(19)  | 1.545(3)  |
| C(18)-C(19)  | 1.3900    |
| C(18)-C(23)  | 1.3900    |
| C(19)-C(20)  | 1.3900    |
| C(20)-C(21)  | 1.3900    |
| C(21)-C(22)  | 1.3900    |
| C(21)-C(24)  | 1.560(3)  |
| C(22)-C(23)  | 1.3900    |
| C(23)-C(34)  | 1.540(3)  |
| C(24)-C(27)  | 1.503(5)  |
| C(24)-C(26)  | 1.518(5)  |
| C(24)-C(25)  | 1.549(5)  |
| C(28)-C(29)  | 1.482(5)  |
| C(30)-C(31)  | 1.490(8)  |
| C(32)-C(33)  | 1.275(8)  |
| C(34)-C(35)  | 1.539(3)  |
| C(35)-C(36)  | 1.3900    |
| C(35)-C(40)  | 1.3900    |

|              |           |
|--------------|-----------|
| C(36)-C(37)  | 1.3900    |
| C(37)-C(38)  | 1.3900    |
| C(37)-C(41)  | 1.567(3)  |
| C(38)-C(39)  | 1.3900    |
| C(39)-C(40)  | 1.3900    |
| C(39)-C(51)  | 1.548(3)  |
| C(41)-C(43)  | 1.510(6)  |
| C(41)-C(42)  | 1.519(6)  |
| C(41)-C(44)  | 1.533(6)  |
| C(45)-C(46)  | 1.509(5)  |
| C(47)-C(48)  | 1.559(9)  |
| C(49)-C(50)  | 1.474(7)  |
| C(51)-C(2)#1 | 1.570(13) |

|                   |            |
|-------------------|------------|
| C(12)-N(1)-C(13)  | 124.7(4)   |
| C(12)-N(1)-C(15)  | 118.4(3)   |
| C(13)-N(1)-C(15)  | 116.9(3)   |
| C(29)-N(2)-C(32') | 116.3(10)  |
| C(29)-N(2)-C(30)  | 125.4(3)   |
| C(32')-N(2)-C(30) | 104.9(10)  |
| C(29)-N(2)-C(32)  | 115.0(4)   |
| C(32')-N(2)-C(32) | 54.2(9)    |
| C(30)-N(2)-C(32)  | 117.9(4)   |
| C(46)-N(3)-C(49)  | 119.6(3)   |
| C(46)-N(3)-C(47)  | 124.2(3)   |
| C(49)-N(3)-C(47)  | 115.9(3)   |
| C(1)-O(1)-C(11)   | 117.1(2)   |
| C(18)-O(3)-C(28)  | 115.4(2)   |
| C(40)-O(5)-C(45)  | 113.3(2)   |
| O(1)-C(1)-C(2)    | 121.37(16) |
| O(1)-C(1)-C(6)    | 118.62(16) |
| C(2)-C(1)-C(6)    | 120.0      |
| C(3)-C(2)-C(1)    | 120.0      |
| C(3)-C(2)-C(51)#1 | 117.79(17) |
| C(1)-C(2)-C(51)#1 | 121.80(17) |
| C(2)-C(3)-C(4)    | 120.0      |
| C(5)-C(4)-C(3)    | 120.0      |
| C(5)-C(4)-C(7)    | 119.7(2)   |
| C(3)-C(4)-C(7)    | 120.3(2)   |
| C(4)-C(5)-C(6)    | 120.0      |
| C(5)-C(6)-C(1)    | 120.0      |
| C(5)-C(6)-C(17)   | 117.97(18) |
| C(1)-C(6)-C(17)   | 121.62(18) |
| C(8')-C(7)-C(10)  | 128.3(8)   |
| C(8')-C(7)-C(9)   | 53.2(9)    |
| C(10)-C(7)-C(9)   | 112.8(7)   |
| C(8')-C(7)-C(4)   | 116.8(7)   |
| C(10)-C(7)-C(4)   | 114.7(4)   |
| C(9)-C(7)-C(4)    | 107.7(4)   |
| C(8')-C(7)-C(10') | 111.5(11)  |
| C(10)-C(7)-C(10') | 46.7(8)    |
| C(9)-C(7)-C(10')  | 144.1(8)   |
| C(4)-C(7)-C(10')  | 108.0(7)   |
| C(8')-C(7)-C(8)   | 50.0(9)    |
| C(10)-C(7)-C(8)   | 110.1(6)   |
| C(9)-C(7)-C(8)    | 103.2(6)   |
| C(4)-C(7)-C(8)    | 107.5(4)   |
| C(10')-C(7)-C(8)  | 59.1(9)    |
| C(8')-C(7)-C(9')  | 105.9(12)  |
| C(10)-C(7)-C(9')  | 59.4(9)    |

|                   |            |
|-------------------|------------|
| C(9)-C(7)-C(9')   | 59.0(8)    |
| C(4)-C(7)-C(9')   | 108.5(7)   |
| C(10')-C(7)-C(9') | 105.6(11)  |
| C(8)-C(7)-C(9')   | 143.4(7)   |
| O(1)-C(11)-C(12)  | 112.1(3)   |
| O(2)-C(12)-N(1)   | 122.7(4)   |
| O(2)-C(12)-C(11)  | 121.6(3)   |
| N(1)-C(12)-C(11)  | 115.7(3)   |
| C(14)-C(13)-N(1)  | 114.3(9)   |
| N(1)-C(15)-C(16)  | 111.3(4)   |
| C(6)-C(17)-C(19)  | 113.9(2)   |
| C(19)-C(18)-C(23) | 120.0      |
| C(19)-C(18)-O(3)  | 120.97(15) |
| C(23)-C(18)-O(3)  | 118.78(16) |
| C(18)-C(19)-C(20) | 120.0      |
| C(18)-C(19)-C(17) | 120.57(17) |
| C(20)-C(19)-C(17) | 119.43(17) |
| C(21)-C(20)-C(19) | 120.0      |
| C(20)-C(21)-C(22) | 120.0      |
| C(20)-C(21)-C(24) | 118.10(17) |
| C(22)-C(21)-C(24) | 121.90(17) |
| C(23)-C(22)-C(21) | 120.0      |
| C(22)-C(23)-C(18) | 120.0      |
| C(22)-C(23)-C(34) | 118.94(16) |
| C(18)-C(23)-C(34) | 121.05(16) |
| C(27)-C(24)-C(26) | 108.2(3)   |
| C(27)-C(24)-C(25) | 110.5(3)   |
| C(26)-C(24)-C(25) | 106.4(3)   |
| C(27)-C(24)-C(21) | 113.2(3)   |
| C(26)-C(24)-C(21) | 109.4(3)   |
| C(25)-C(24)-C(21) | 108.9(3)   |
| O(3)-C(28)-C(29)  | 109.5(3)   |
| O(4)-C(29)-N(2)   | 122.0(4)   |
| O(4)-C(29)-C(28)  | 121.8(3)   |
| N(2)-C(29)-C(28)  | 115.9(3)   |
| N(2)-C(30)-C(31)  | 113.1(5)   |
| C(33)-C(32)-N(2)  | 104.9(6)   |
| C(23)-C(34)-C(35) | 113.6(2)   |
| C(36)-C(35)-C(40) | 120.0      |
| C(36)-C(35)-C(34) | 117.71(17) |
| C(40)-C(35)-C(34) | 122.14(17) |
| C(35)-C(36)-C(37) | 120.0      |
| C(38)-C(37)-C(36) | 120.0      |
| C(38)-C(37)-C(41) | 120.14(18) |
| C(36)-C(37)-C(41) | 119.66(18) |
| C(37)-C(38)-C(39) | 120.0      |
| C(40)-C(39)-C(38) | 120.0      |
| C(40)-C(39)-C(51) | 121.18(17) |
| C(38)-C(39)-C(51) | 118.80(17) |
| C(39)-C(40)-C(35) | 120.0      |
| C(39)-C(40)-O(5)  | 119.49(16) |
| C(35)-C(40)-O(5)  | 120.39(15) |
| C(43)-C(41)-C(42) | 106.0(4)   |
| C(43)-C(41)-C(44) | 109.9(4)   |
| C(42)-C(41)-C(44) | 110.5(4)   |
| C(43)-C(41)-C(37) | 111.3(3)   |
| C(42)-C(41)-C(37) | 110.8(3)   |
| C(44)-C(41)-C(37) | 108.3(3)   |
| O(5)-C(45)-C(46)  | 109.0(3)   |
| O(6)-C(46)-N(3)   | 121.6(3)   |

|                    |          |
|--------------------|----------|
| O(6)-C(46)-C(45)   | 119.9(3) |
| N(3)-C(46)-C(45)   | 118.5(3) |
| N(3)-C(47)-C(48)   | 111.1(5) |
| N(3)-C(49)-C(50)   | 114.6(4) |
| C(39)-C(51)-C(2)#1 | 112.3(4) |

---

Symmetry transformations used to generate equivalent atoms:  
#1 -x+1,-y+1,-z

Table 4. Anisotropic displacement parameters ( $\text{Å}^2 \times 10^3$ ) for cd001. The anisotropic displacement factor exponent takes the form:  $-2 \pi^2 [ h^2 a^{*2} U_{11} + \dots + 2 h k a^* b^* U_{12} ]$

|        | U11    | U22     | U33    | U23    | U13    | U12    |
|--------|--------|---------|--------|--------|--------|--------|
| N(1)   | 46(2)  | 67(2)   | 77(2)  | -18(2) | -1(2)  | -12(2) |
| N(2)   | 72(3)  | 139(4)  | 118(3) | -96(3) | 29(2)  | -39(3) |
| N(3)   | 36(2)  | 67(2)   | 72(2)  | -11(2) | -13(2) | -2(1)  |
| O(1)   | 44(1)  | 49(1)   | 44(1)  | 7(1)   | -11(1) | -3(1)  |
| O(2)   | 58(2)  | 77(2)   | 76(2)  | -24(2) | 4(2)   | -12(1) |
| O(3)   | 36(1)  | 42(1)   | 57(1)  | -11(1) | -7(1)  | 2(1)   |
| O(4)   | 57(2)  | 128(3)  | 98(2)  | -59(2) | 22(2)  | -21(2) |
| O(5)   | 32(1)  | 54(1)   | 40(1)  | 0(1)   | -6(1)  | -7(1)  |
| O(6)   | 54(2)  | 96(2)   | 149(3) | -68(2) | -23(2) | 9(2)   |
| O(7)   | 75(2)  | 218(5)  | 94(3)  | -38(3) | 16(2)  | -26(3) |
| C(1)   | 38(2)  | 36(2)   | 39(2)  | 10(1)  | -10(2) | -6(1)  |
| C(2)   | 39(2)  | 38(2)   | 43(2)  | 8(2)   | -6(2)  | -6(1)  |
| C(3)   | 48(2)  | 45(2)   | 43(2)  | 7(2)   | -8(2)  | -2(2)  |
| C(4)   | 47(2)  | 50(2)   | 52(2)  | 6(2)   | -13(2) | 1(2)   |
| C(5)   | 38(2)  | 46(2)   | 59(2)  | 8(2)   | -5(2)  | 2(2)   |
| C(6)   | 43(2)  | 35(2)   | 46(2)  | 8(2)   | -6(2)  | -3(1)  |
| C(7)   | 60(3)  | 99(3)   | 59(3)  | 5(2)   | -25(2) | 18(2)  |
| C(8)   | 86(5)  | 161(8)  | 98(6)  | 81(7)  | -31(4) | -2(6)  |
| C(9)   | 93(6)  | 163(8)  | 102(6) | -15(6) | -58(5) | -10(6) |
| C(10)  | 60(6)  | 268(16) | 73(5)  | 31(7)  | -16(5) | 72(7)  |
| C(8')  | 86(5)  | 161(8)  | 98(6)  | 81(7)  | -31(4) | -2(6)  |
| C(9')  | 93(6)  | 163(8)  | 102(6) | -15(6) | -58(5) | -10(6) |
| C(10') | 60(6)  | 268(16) | 73(5)  | 31(7)  | -16(5) | 72(7)  |
| C(11)  | 40(2)  | 63(2)   | 57(2)  | -4(2)  | -9(2)  | -6(2)  |
| C(12)  | 39(2)  | 53(2)   | 64(2)  | -4(2)  | -5(2)  | 4(2)   |
| C(13)  | 71(4)  | 149(6)  | 134(5) | -60(5) | 30(4)  | -64(4) |
| C(14)  | 156(9) | 80(6)   | 119(7) | -15(5) | 31(6)  | -9(5)  |
| C(13') | 71(4)  | 149(6)  | 134(5) | -60(5) | 30(4)  | -64(4) |
| C(14') | 156(9) | 80(6)   | 119(7) | -15(5) | 31(6)  | -9(5)  |
| C(15)  | 59(3)  | 70(3)   | 116(4) | -41(3) | 14(3)  | -12(2) |
| C(16)  | 92(4)  | 198(7)  | 84(4)  | -40(4) | -18(3) | 4(4)   |
| C(17)  | 41(2)  | 41(2)   | 50(2)  | 2(2)   | -3(2)  | 0(1)   |
| C(18)  | 30(2)  | 35(2)   | 37(2)  | -5(1)  | -5(1)  | 4(1)   |
| C(19)  | 29(2)  | 36(2)   | 45(2)  | 2(2)   | -9(1)  | 3(1)   |
| C(20)  | 34(2)  | 42(2)   | 35(2)  | 4(2)   | -5(1)  | 2(1)   |
| C(21)  | 30(2)  | 39(2)   | 35(2)  | 2(1)   | -9(1)  | 4(1)   |
| C(22)  | 34(2)  | 35(2)   | 39(2)  | 4(2)   | -7(1)  | 2(1)   |
| C(23)  | 30(2)  | 41(2)   | 34(2)  | 0(1)   | -12(1) | 5(1)   |
| C(24)  | 48(2)  | 42(2)   | 39(2)  | -5(2)  | -10(2) | 8(2)   |
| C(25)  | 61(3)  | 86(3)   | 93(3)  | -35(3) | -21(2) | 29(2)  |
| C(26)  | 75(3)  | 65(2)   | 49(2)  | -13(2) | -14(2) | 6(2)   |
| C(27)  | 144(5) | 49(3)   | 74(3)  | -20(2) | 24(3)  | -20(3) |
| C(28)  | 45(2)  | 64(2)   | 60(2)  | -22(2) | -1(2)  | -12(2) |
| C(29)  | 44(2)  | 71(3)   | 72(3)  | -35(2) | 8(2)   | -5(2)  |
| C(30)  | 86(4)  | 104(4)  | 98(4)  | -51(3) | 19(3)  | -47(3) |
| C(31)  | 76(4)  | 147(5)  | 121(5) | 2(4)   | 14(3)  | -20(4) |
| C(32)  | 86(4)  | 66(4)   | 69(4)  | 12(3)  | -6(3)  | -12(3) |
| C(33)  | 163(7) | 115(6)  | 185(9) | -26(6) | 77(6)  | -17(5) |
| C(32') | 86(4)  | 66(4)   | 69(4)  | 12(3)  | -6(3)  | -12(3) |
| C(33') | 163(7) | 115(6)  | 185(9) | -26(6) | 77(6)  | -17(5) |



|       |        |        |         |         |        |        |
|-------|--------|--------|---------|---------|--------|--------|
| C(34) | 31(2)  | 43(2)  | 44(2)   | -1(2)   | 0(2)   | 2(1)   |
| C(35) | 27(2)  | 48(2)  | 36(2)   | -1(2)   | 1(1)   | 2(1)   |
| C(36) | 38(2)  | 45(2)  | 41(2)   | 0(2)    | 4(2)   | 2(1)   |
| C(37) | 33(2)  | 58(2)  | 40(2)   | -4(2)   | -1(2)  | 1(2)   |
| C(38) | 38(2)  | 45(2)  | 40(2)   | 4(2)    | -5(2)  | -2(2)  |
| C(39) | 31(2)  | 53(2)  | 39(2)   | 0(2)    | 0(2)   | -3(1)  |
| C(40) | 30(2)  | 46(2)  | 35(2)   | -3(2)   | 0(1)   | -1(1)  |
| C(41) | 45(2)  | 54(2)  | 46(2)   | -13(2)  | -10(2) | -2(2)  |
| C(42) | 110(4) | 86(3)  | 99(4)   | -1(3)   | -55(3) | -34(3) |
| C(43) | 84(3)  | 80(3)  | 96(3)   | -24(3)  | -50(3) | 6(2)   |
| C(44) | 78(3)  | 221(7) | 91(4)   | -104(4) | 2(3)   | -12(4) |
| C(45) | 37(2)  | 64(2)  | 47(2)   | -1(2)   | -2(2)  | -8(2)  |
| C(46) | 42(2)  | 47(2)  | 66(2)   | -3(2)   | -9(2)  | -1(2)  |
| C(47) | 40(2)  | 121(5) | 160(5)  | -51(4)  | -6(3)  | 3(3)   |
| C(48) | 109(5) | 96(5)  | 268(10) | -25(6)  | -34(6) | 16(4)  |
| C(49) | 50(2)  | 73(3)  | 92(3)   | -12(2)  | -28(2) | -4(2)  |
| C(50) | 95(4)  | 108(4) | 164(6)  | 21(4)   | -51(4) | -50(3) |
| C(51) | 43(2)  | 43(2)  | 41(2)   | 6(2)    | -4(2)  | -6(1)  |
| C(52) | 83(4)  | 107(4) | 107(4)  | -19(3)  | -9(3)  | 9(3)   |

---

Table 5. Hydrogen coordinates ( $\times 10^4$ ) and isotropic displacement parameters ( $\text{\AA}^2 \times 10^3$ ) for cd001.

|        | x    | y     | z     | U(eq) |
|--------|------|-------|-------|-------|
| H(7)   | 1466 | 8081  | 1598  | 193   |
| H(3A)  | 5267 | 7558  | -2446 | 55    |
| H(5A)  | 3304 | 8215  | -1370 | 57    |
| H(8A)  | 3538 | 8883  | -3179 | 173   |
| H(8B)  | 4516 | 8467  | -3014 | 173   |
| H(8C)  | 4128 | 9333  | -2694 | 173   |
| H(9A)  | 3107 | 6704  | -2548 | 180   |
| H(9B)  | 3999 | 6955  | -2878 | 180   |
| H(9C)  | 3015 | 7272  | -3100 | 180   |
| H(10A) | 2330 | 8099  | -1989 | 201   |
| H(10B) | 2143 | 8454  | -2594 | 201   |
| H(10C) | 2654 | 9104  | -2162 | 201   |
| H(8'A) | 4052 | 7280  | -3003 | 173   |
| H(8'B) | 4275 | 8348  | -3076 | 173   |
| H(8'C) | 3289 | 7960  | -3246 | 173   |
| H(9'A) | 2810 | 6764  | -2406 | 180   |
| H(9'B) | 2148 | 7541  | -2649 | 180   |
| H(9'C) | 2368 | 7504  | -2012 | 180   |
| H(10D) | 3606 | 9529  | -2437 | 201   |
| H(10E) | 2836 | 9165  | -2043 | 201   |
| H(10F) | 2641 | 9198  | -2682 | 201   |
| H(11A) | 6829 | 8481  | -940  | 64    |
| H(11B) | 7375 | 7716  | -598  | 64    |
| H(13A) | 8794 | 9353  | -123  | 141   |
| H(13B) | 8262 | 8800  | -591  | 141   |
| H(14A) | 8745 | 10106 | -896  | 177   |
| H(14B) | 8228 | 10648 | -431  | 177   |
| H(14C) | 7654 | 10107 | -888  | 177   |
| H(13C) | 8238 | 8761  | -558  | 141   |
| H(13D) | 8032 | 9817  | -618  | 141   |
| H(14D) | 9384 | 9498  | -615  | 177   |
| H(14E) | 9331 | 9064  | -22   | 177   |
| H(14F) | 9130 | 10133 | -112  | 177   |
| H(15A) | 6824 | 9877  | 624   | 98    |
| H(15B) | 7692 | 10433 | 418   | 98    |
| H(16A) | 8055 | 9779  | 1260  | 187   |
| H(16B) | 8662 | 9293  | 813   | 187   |
| H(16C) | 7784 | 8781  | 1039  | 187   |
| H(17A) | 3704 | 8395  | -412  | 53    |
| H(17B) | 4682 | 8081  | -181  | 53    |
| H(20A) | 4210 | 6220  | -879  | 44    |
| H(22A) | 2758 | 4741  | 205   | 43    |
| H(25A) | 4808 | 3749  | -1008 | 120   |
| H(25B) | 4957 | 4179  | -416  | 120   |
| H(25C) | 5009 | 4823  | -940  | 120   |
| H(26A) | 3423 | 4142  | -1559 | 95    |
| H(26B) | 3662 | 5204  | -1475 | 95    |
| H(26C) | 2671 | 4829  | -1332 | 95    |
| H(27A) | 3285 | 3116  | -793  | 133   |
| H(27B) | 2505 | 3755  | -553  | 133   |
| H(27C) | 3376 | 3487  | -185  | 133   |

|        |       |       |      |     |
|--------|-------|-------|------|-----|
| H(28A) | 4095  | 8647  | 591  | 68  |
| H(28B) | 4307  | 7690  | 890  | 68  |
| H(30A) | 5155  | 10053 | 1480 | 115 |
| H(30B) | 5037  | 9337  | 993  | 115 |
| H(31A) | 6384  | 9020  | 1474 | 172 |
| H(31B) | 5695  | 8180  | 1547 | 172 |
| H(31C) | 5836  | 8914  | 2023 | 172 |
| H(32A) | 3482  | 8866  | 2393 | 89  |
| H(32B) | 4472  | 9330  | 2473 | 89  |
| H(33A) | 3370  | 10295 | 2627 | 230 |
| H(33B) | 2976  | 10130 | 2025 | 230 |
| H(33C) | 3958  | 10590 | 2118 | 230 |
| H(32C) | 4161  | 10514 | 1741 | 89  |
| H(32D) | 3162  | 10154 | 1605 | 89  |
| H(33D) | 3277  | 10753 | 2295 | 230 |
| H(33E) | 4072  | 10070 | 2491 | 230 |
| H(33F) | 3072  | 9680  | 2357 | 230 |
| H(34A) | 1751  | 5750  | 857  | 47  |
| H(34B) | 2247  | 6657  | 1079 | 47  |
| H(36A) | 3419  | 6578  | 1763 | 50  |
| H(38A) | 4224  | 4139  | 2428 | 50  |
| H(42A) | 4431  | 7230  | 2221 | 149 |
| H(42B) | 5343  | 6663  | 2114 | 149 |
| H(42C) | 5216  | 7174  | 2681 | 149 |
| H(43A) | 4993  | 4828  | 3007 | 131 |
| H(43B) | 5565  | 5741  | 3135 | 131 |
| H(43C) | 5661  | 5236  | 2564 | 131 |
| H(44A) | 3510  | 5666  | 3209 | 195 |
| H(44B) | 3313  | 6631  | 2920 | 195 |
| H(44C) | 4122  | 6542  | 3363 | 195 |
| H(45A) | 1047  | 4565  | 1276 | 59  |
| H(45B) | 1300  | 3615  | 1572 | 59  |
| H(47A) | -340  | 4459  | 1410 | 129 |
| H(47B) | -1288 | 4204  | 1111 | 129 |
| H(48A) | -884  | 5780  | 919  | 238 |
| H(48B) | -924  | 5202  | 369  | 238 |
| H(48C) | 39    | 5440  | 652  | 238 |
| H(49A) | -391  | 2893  | 71   | 87  |
| H(49B) | -1250 | 3502  | 231  | 87  |
| H(50A) | -1565 | 1943  | 322  | 185 |
| H(50B) | -1623 | 2448  | 895  | 185 |
| H(50C) | -745  | 1847  | 758  | 185 |
| H(51A) | 2868  | 2699  | 1524 | 51  |
| H(51B) | 3151  | 2712  | 2153 | 51  |
| H(52A) | 232   | 7311  | 1080 | 149 |
| H(52B) | 1030  | 7917  | 832  | 149 |
| H(52C) | 94    | 8392  | 1000 | 149 |

---
