# Supplementary material for: Complexation of the caesium cation by the host p-tert-butylcalix[6]arene hexaacetamide
Source: Royal Society of Chemistry journal article supplement (doi:10.1039/b307897n), 2003-01-01
Supplement: b307897n2.pdf [file b307897n2.pdf]

*Complexation of the cesium cation by the host p-tert-butyl-calix[6]arene-hexacetamide.*

Urs C. Meier and Christian Detellier

Submitted for publication to J.C.S. Dalton Trans. On July 9, 2003

Supplementary crystallographic data, compound II

Table 2. Atomic coordinates ( $\times 10^4$ ) and equivalent isotropic displacement parameters ( $\text{\AA}^2 \times 10^3$ ) for cd002. (II)  
 $U(\text{eq})$  is defined as one third of the trace of the orthogonalized  $U_{ij}$  tensor.

|        | x        | y        | z        | U(eq)  |
|--------|----------|----------|----------|--------|
| Cs(1)  | 3273(1)  | 8597(1)  | 852(1)   | 43(1)  |
| Cs(2)  | 3031(1)  | 9990(1)  | 2069(1)  | 41(1)  |
| I(1)   | 3424(1)  | 7091(1)  | -555(1)  | 91(1)  |
| I(2)   | 3672(1)  | 6586(1)  | 612(1)   | 86(1)  |
| I(3)   | 3949(1)  | 6210(2)  | 1760(1)  | 173(1) |
| I(4)   | 2314(1)  | 4275(1)  | 2234(1)  | 94(1)  |
| I(5)   | 2480(1)  | 3492(1)  | 3304(1)  | 79(1)  |
| I(6)   | 2696(1)  | 2609(1)  | 4318(1)  | 97(1)  |
| O(1)   | 2258(3)  | 7998(4)  | 683(3)   | 38(2)  |
| O(2)   | 2302(3)  | 9338(5)  | 1058(4)  | 52(3)  |
| O(3)   | 2869(3)  | 8208(4)  | 2370(3)  | 37(2)  |
| O(4)   | 3643(3)  | 8623(5)  | 2083(4)  | 53(3)  |
| O(5)   | 2735(3)  | 9943(5)  | 3172(3)  | 37(2)  |
| O(6)   | 3664(4)  | 9828(8)  | 3306(4)  | 93(4)  |
| O(7)   | 2678(3)  | 11535(4) | 2245(4)  | 40(2)  |
| O(8)   | 3561(4)  | 11469(6) | 2107(5)  | 75(3)  |
| O(9)   | 2646(3)  | 10972(5) | 849(3)   | 39(2)  |
| O(10)  | 3441(3)  | 10166(5) | 1086(4)  | 43(2)  |
| O(11)  | 2563(3)  | 8854(5)  | -290(3)  | 38(2)  |
| O(12)  | 3498(3)  | 9221(6)  | -130(4)  | 68(3)  |
| N(1)   | 1587(4)  | 9311(5)  | 1267(5)  | 63(4)  |
| N(2)   | 4194(4)  | 8124(6)  | 2828(4)  | 53(3)  |
| N(3)   | 3895(3)  | 10091(6) | 4224(4)  | 52(3)  |
| N(4)   | 3916(3)  | 12166(6) | 2833(4)  | 51(3)  |
| N(5)   | 3902(4)  | 11019(6) | 833(6)   | 71(4)  |
| N(6)   | 3398(3)  | 9532(6)  | -1036(4) | 45(3)  |
| C(1)   | 2096(3)  | 6997(4)  | 24(3)    | 39(3)  |
| C(2)   | 2078(3)  | 6246(4)  | -85(2)   | 39(3)  |
| C(3)   | 2212(3)  | 5746(3)  | 353(3)   | 41(3)  |
| C(4)   | 2363(3)  | 5998(4)  | 900(3)   | 48(4)  |
| C(5)   | 2381(3)  | 6749(4)  | 1009(2)  | 45(3)  |
| C(6)   | 2247(3)  | 7249(3)  | 571(3)   | 36(3)  |
| C(7)   | 2177(5)  | 4904(8)  | 256(6)   | 51(4)  |
| C(8)   | 2052(7)  | 4690(11) | -362(8)  | 97(6)  |
| C(9)   | 1790(6)  | 4565(10) | 476(8)   | 84(5)  |
| C(10)  | 2673(7)  | 4567(11) | 568(9)   | 103(6) |
| C(11)  | 1844(4)  | 8246(7)  | 833(5)   | 38(3)  |
| C(12)  | 1946(5)  | 9023(7)  | 1075(5)  | 38(3)  |
| C(13)  | 1648(5)  | 10081(7) | 1468(7)  | 65(5)  |
| C(14)  | 1224(6)  | 10532(8) | 1194(8)  | 89(6)  |
| C(15)  | 1309(7)  | 8842(14) | 1566(8)  | 53(7)  |
| C(16)  | 838(7)   | 8651(14) | 1162(11) | 60(7)  |
| C(15') | 1086(7)  | 8975(16) | 1153(10) | 53(7)  |
| C(16') | 1064(10) | 8529(15) | 1636(12) | 60(7)  |
| C(17)  | 2646(5)  | 7045(7)  | 1595(5)  | 42(3)  |
| C(18)  | 2333(2)  | 7199(4)  | 1993(3)  | 29(3)  |
| C(19)  | 1944(3)  | 6744(4)  | 2001(3)  | 38(3)  |
| C(20)  | 1700(2)  | 6843(4)  | 2405(3)  | 31(3)  |
| C(21)  | 1845(3)  | 7396(4)  | 2802(3)  | 35(3)  |

|       |          |            |            |          |
|-------|----------|------------|------------|----------|
| C(22) | 2234 (9) | 7850 (4)   | 2794 (3)   | 36 (3)   |
| C(23) | 2477 (2) | 7752 (4)   | 2390 (3)   | 37 (3)   |
| C(24) | 1278 (5) | 6309 (7)   | 2455 (6)   | 42 (3)   |
| C(25) | 1123 (5) | 5811 (8)   | 1950 (6)   | 61 (4)   |
| C(26) | 1438 (5) | 5833 (8)   | 2954 (7)   | 62 (4)   |
| C(27) | 849 (6)  | 6779 (9)   | 2498 (7)   | 74 (5)   |
| C(28) | 3325 (4) | 7932 (7)   | 2710 (6)   | 43 (3)   |
| C(29) | 3727 (5) | 8257 (7)   | 2505 (6)   | 39 (3)   |
| C(30) | 4323 (6) | 7705 (7)   | 3352 (6)   | 69 (5)   |
| C(31) | 4449 (8) | 6935 (8)   | 3256 (9)   | 115 (7)  |
| C(32) | 4606 (5) | 8414 (8)   | 2656 (7)   | 71 (5)   |
| C(33) | 4749 (6) | 9147 (8)   | 2886 (8)   | 98 (6)   |
| C(34) | 2368 (5) | 8501 (7)   | 3219 (6)   | 42 (3)   |
| C(35) | 2046 (2) | 9173 (3)   | 3132 (4)   | 36 (3)   |
| C(36) | 1555 (3) | 9100 (3)   | 3093 (4)   | 41 (3)   |
| C(37) | 1263 (2) | 9722 (4)   | 3046 (4)   | 37 (3)   |
| C(38) | 1464 (2) | 10418 (3)  | 3037 (4)   | 39 (3)   |
| C(39) | 1955 (2) | 10491 (3)  | 3076 (4)   | 36 (3)   |
| C(40) | 2247 (2) | 9869 (4)   | 3123 (4)   | 33 (3)   |
| C(41) | 720 (5)  | 9642 (8)   | 3025 (6)   | 47 (4)   |
| C(42) | 441 (10) | 9245 (15)  | 2467 (12)  | 164 (11) |
| C(43) | 626 (12) | 9056 (18)  | 3360 (14)  | 191 (13) |
| C(44) | 452 (10) | 10308 (14) | 2996 (12)  | 148 (10) |
| C(45) | 3030 (4) | 9991 (7)   | 3734 (5)   | 37 (3)   |
| C(46) | 3563 (5) | 9974 (8)   | 3735 (7)   | 56 (4)   |
| C(47) | 3785 (6) | 10185 (7)  | 4765 (6)   | 62 (4)   |
| C(48) | 3797 (7) | 10956 (8)  | 4934 (7)   | 90 (6)   |
| C(49) | 4414 (5) | 10036 (8)  | 4242 (8)   | 77 (5)   |
| C(50) | 4607 (6) | 9302 (9)   | 4424 (9)   | 111 (7)  |
| C(51) | 2167 (5) | 11249 (7)  | 3075 (6)   | 42 (3)   |
| C(52) | 1957 (3) | 11719 (4)  | 2546 (3)   | 37 (3)   |
| C(53) | 1512 (3) | 12066 (4)  | 2476 (3)   | 40 (3)   |
| C(54) | 1315 (2) | 12493 (4)  | 2004 (3)   | 42 (3)   |
| C(55) | 1564 (3) | 12572 (4)  | 1603 (3)   | 41 (3)   |
| C(56) | 2009 (3) | 12224 (4)  | 1673 (3)   | 38 (3)   |
| C(57) | 2206 (2) | 11798 (4)  | 2145 (3)   | 31 (3)   |
| C(58) | 851 (5)  | 12929 (7)  | 1960 (6)   | 47 (4)   |
| C(59) | 482 (6)  | 12491 (9)  | 2131 (8)   | 82 (5)   |
| C(60) | 964 (7)  | 13573 (10) | 2375 (8)   | 88 (6)   |
| C(61) | 638 (7)  | 13260 (12) | 1386 (9)   | 105 (7)  |
| C(62) | 3032 (5) | 12066 (7)  | 2556 (6)   | 48 (4)   |
| C(63) | 3532 (5) | 11861 (8)  | 2490 (6)   | 43 (3)   |
| C(64) | 3898 (7) | 12649 (8)  | 3299 (6)   | 83 (5)   |
| C(65) | 3944 (8) | 12211 (12) | 3812 (6)   | 123 (8)  |
| C(66) | 4405 (5) | 12033 (9)  | 2762 (8)   | 87 (6)   |
| C(67) | 4609 (8) | 11339 (12) | 3023 (12)  | 155 (10) |
| C(68) | 2274 (5) | 12332 (8)  | 1214 (6)   | 49 (4)   |
| C(69) | 2035 (3) | 11945 (4)  | 668 (3)    | 39 (3)   |
| C(70) | 1628 (3) | 12272 (4)  | 307 (3)    | 46 (4)   |
| C(71) | 1406 (3) | 11948 (4)  | -205 (3)   | 50 (4)   |
| C(72) | 1589 (3) | 11296 (4)  | -356 (3)   | 50 (4)   |
| C(73) | 1995 (3) | 10968 (4)  | 4 (3)      | 39 (3)   |
| C(74) | 2218 (2) | 11293 (4)  | 516 (3)    | 42 (3)   |
| C(75) | 976 (5)  | 12339 (8)  | -632 (6)   | 52 (4)   |
| C(76) | 771 (9)  | 12957 (14) | -382 (11)  | 143 (9)  |
| C(77) | 1179 (8) | 12752 (13) | -1059 (10) | 125 (8)  |
| C(78) | 597 (8)  | 11833 (13) | -928 (10)  | 128 (8)  |
| C(79) | 3060 (5) | 11271 (7)  | 710 (6)    | 46 (4)   |
| C(80) | 3481 (5) | 10768 (8)  | 905 (6)    | 39 (3)   |
| C(81) | 3968 (6) | 11737 (7)  | 588 (6)    | 72 (5)   |

|        |          |            |           |          |
|--------|----------|------------|-----------|----------|
| C(82)  | 4219 (8) | 12249 (9)  | 1020 (9)  | 132 (8)  |
| C(83)  | 4321 (7) | 10499 (11) | 944 (8)   | 109 (7)  |
| C(84)  | 4542 (7) | 10449 (13) | 1547 (8)  | 136 (9)  |
| C(85)  | 2205 (5) | 10257 (7)  | -162 (6)  | 46 (4)   |
| C(86)  | 1854 (2) | 9565 (3)   | -319 (4)  | 35 (3)   |
| C(87)  | 1354 (2) | 9610 (3)   | -404 (4)  | 38 (3)   |
| C(88)  | 1069 (2) | 8980 (4)   | -535 (4)  | 41 (3)   |
| C(89)  | 1284 (2) | 8305 (3)   | -580 (4)  | 43 (3)   |
| C(90)  | 1784 (3) | 8260 (3)   | -495 (4)  | 41 (3)   |
| C(91)  | 2069 (2) | 8890 (4)   | -364 (4)  | 35 (3)   |
| C(92)  | 505 (4)  | 9056 (7)   | -714 (5)  | 36 (3)   |
| C(93)  | 329 (8)  | 9662 (12)  | -398 (10) | 110 (7)  |
| C(94)  | 320 (7)  | 9173 (10)  | -1324 (7) | 84 (5)   |
| C(95)  | 290 (8)  | 8375 (12)  | -557 (10) | 122 (8)  |
| C(96)  | 2702 (5) | 9048 (8)   | -778 (6)  | 52 (4)   |
| C(97)  | 3230 (5) | 9293 (7)   | -622 (6)  | 42 (3)   |
| C(98)  | 3109 (5) | 9646 (7)   | -1616 (5) | 47 (4)   |
| C(99)  | 3103 (6) | 8982 (8)   | -1961 (6) | 78 (5)   |
| C(100) | 3907 (5) | 9783 (8)   | -904 (8)  | 77 (5)   |
| C(101) | 3939 (7) | 10561 (8)  | -735 (9)  | 104 (7)  |
| C(102) | 2032 (5) | 7501 (7)   | -484 (6)  | 46 (4)   |
| C(104) | 4511 (7) | 8136 (14)  | 347 (6)   | 128 (8)  |
| C(105) | 3639 (9) | 14267 (14) | 2185 (9)  | 166 (11) |
| Cl (1) | 4728 (2) | 8384 (4)   | 1029 (2)  | 123 (2)  |
| Cl (2) | 4939 (2) | 8085 (7)   | -6 (3)    | 199 (5)  |
| Cl (3) | 3725 (4) | 13579 (5)  | 1761 (4)  | 203 (4)  |
| Cl (4) | 4114 (3) | 14443 (5)  | 2740 (3)  | 152 (3)  |

---

Table 3. Bond lengths [Å] and angles [deg] for cd002.

|              |             |
|--------------|-------------|
| Cs (1)-O(10) | 2.920 (8)   |
| Cs (1)-O(12) | 2.933 (9)   |
| Cs (1)-O(4)  | 2.958 (9)   |
| Cs (1)-O(1)  | 3.018 (8)   |
| Cs (1)-O(11) | 3.040 (8)   |
| Cs (1)-O(2)  | 3.256 (9)   |
| Cs (1)-C(6)  | 3.735 (7)   |
| Cs (1)-C(97) | 3.861 (15)  |
| Cs (1)-I(2)  | 3.9237 (18) |
| Cs (1)-Cl(1) | 4.085 (6)   |
| Cs (1)-Cs(2) | 4.1581 (14) |
| Cs (2)-O(10) | 3.021 (9)   |
| Cs (2)-O(2)  | 3.030 (9)   |
| Cs (2)-O(4)  | 3.034 (9)   |
| Cs (2)-O(7)  | 3.056 (8)   |
| Cs (2)-O(8)  | 3.075 (10)  |
| Cs (2)-O(5)  | 3.099 (8)   |
| Cs (2)-O(6)  | 3.128 (11)  |
| Cs (2)-O(3)  | 3.382 (8)   |
| Cs (2)-O(9)  | 3.436 (8)   |
| Cs (2)-C(29) | 3.721 (13)  |
| Cs (2)-C(63) | 3.723 (14)  |
| Cs (2)-C(80) | 3.770 (14)  |
| I (1)-I(2)   | 2.946 (2)   |
| I (2)-I(3)   | 2.834 (3)   |
| I (4)-I(5)   | 2.945 (2)   |
| I (5)-I(6)   | 2.913 (2)   |
| O(1)-C(6)    | 1.388 (9)   |
| O(1)-C(11)   | 1.414 (14)  |
| O(2)-C(12)   | 1.181 (15)  |
| O(3)-C(23)   | 1.405 (9)   |
| O(3)-C(28)   | 1.435 (15)  |
| O(4)-C(29)   | 1.212 (15)  |
| O(5)-C(40)   | 1.378 (9)   |
| O(5)-C(45)   | 1.424 (15)  |
| O(6)-C(46)   | 1.214 (18)  |
| O(7)-C(57)   | 1.388 (9)   |
| O(7)-C(62)   | 1.455 (15)  |
| O(8)-C(63)   | 1.213 (16)  |
| O(9)-C(74)   | 1.400 (10)  |
| O(9)-C(79)   | 1.432 (15)  |
| O(10)-C(80)  | 1.201 (14)  |
| O(11)-C(91)  | 1.374 (9)   |
| O(11)-C(96)  | 1.427 (16)  |
| O(12)-C(97)  | 1.259 (16)  |
| N(1)-C(12)   | 1.353 (16)  |
| N(1)-C(13)   | 1.479 (12)  |
| N(1)-C(15)   | 1.499 (14)  |
| N(1)-C(15')  | 1.512 (14)  |
| N(2)-C(29)   | 1.376 (16)  |
| N(2)-C(32)   | 1.462 (12)  |
| N(2)-C(30)   | 1.468 (12)  |
| N(3)-C(46)   | 1.339 (19)  |
| N(3)-C(49)   | 1.475 (12)  |
| N(3)-C(47)   | 1.481 (12)  |
| N(4)-C(63)   | 1.313 (16)  |

|               |           |
|---------------|-----------|
| N(4)-C(64)    | 1.470(12) |
| N(4)-C(66)    | 1.479(12) |
| N(5)-C(80)    | 1.348(16) |
| N(5)-C(81)    | 1.476(12) |
| N(5)-C(83)    | 1.490(13) |
| N(6)-C(97)    | 1.329(16) |
| N(6)-C(98)    | 1.466(11) |
| N(6)-C(100)   | 1.476(12) |
| C(1)-C(2)     | 1.3900    |
| C(1)-C(6)     | 1.3900    |
| C(1)-C(102)   | 1.532(14) |
| C(2)-C(3)     | 1.3900    |
| C(3)-C(4)     | 1.3900    |
| C(3)-C(7)     | 1.547(15) |
| C(4)-C(5)     | 1.3900    |
| C(5)-C(6)     | 1.3900    |
| C(5)-C(17)    | 1.544(14) |
| C(7)-C(9)     | 1.50(2)   |
| C(7)-C(8)     | 1.53(2)   |
| C(7)-C(10)    | 1.54(2)   |
| C(11)-C(12)   | 1.531(18) |
| C(13)-C(14)   | 1.467(13) |
| C(15)-C(16)   | 1.482(15) |
| C(15')-C(16') | 1.470(15) |
| C(17)-C(18)   | 1.541(14) |
| C(18)-C(19)   | 1.3900    |
| C(18)-C(23)   | 1.3900    |
| C(19)-C(20)   | 1.3900    |
| C(20)-C(21)   | 1.3900    |
| C(20)-C(24)   | 1.582(14) |
| C(21)-C(22)   | 1.3900    |
| C(22)-C(23)   | 1.3900    |
| C(22)-C(34)   | 1.563(14) |
| C(24)-C(26)   | 1.478(19) |
| C(24)-C(25)   | 1.51(2)   |
| C(24)-C(27)   | 1.52(2)   |
| C(28)-C(29)   | 1.505(18) |
| C(30)-C(31)   | 1.482(13) |
| C(32)-C(33)   | 1.463(13) |
| C(34)-C(35)   | 1.507(13) |
| C(35)-C(36)   | 1.3900    |
| C(35)-C(40)   | 1.3900    |
| C(36)-C(37)   | 1.3900    |
| C(37)-C(38)   | 1.3900    |
| C(37)-C(41)   | 1.548(14) |
| C(38)-C(39)   | 1.3900    |
| C(39)-C(40)   | 1.3900    |
| C(39)-C(51)   | 1.504(13) |
| C(41)-C(44)   | 1.42(3)   |
| C(41)-C(43)   | 1.42(3)   |
| C(41)-C(42)   | 1.57(3)   |
| C(45)-C(46)   | 1.525(19) |
| C(47)-C(48)   | 1.459(13) |
| C(49)-C(50)   | 1.465(13) |
| C(51)-C(52)   | 1.546(14) |
| C(52)-C(53)   | 1.3900    |
| C(52)-C(57)   | 1.3900    |
| C(53)-C(54)   | 1.3900    |
| C(54)-C(55)   | 1.3900    |
| C(54)-C(58)   | 1.523(14) |

|                |           |
|----------------|-----------|
| C(55) -C(56)   | 1.3900    |
| C(56) -C(57)   | 1.3900    |
| C(56) -C(68)   | 1.554(15) |
| C(58) -C(59)   | 1.48(2)   |
| C(58) -C(61)   | 1.52(2)   |
| C(58) -C(60)   | 1.54(2)   |
| C(62) -C(63)   | 1.533(19) |
| C(64) -C(65)   | 1.482(14) |
| C(66) -C(67)   | 1.463(14) |
| C(68) -C(69)   | 1.517(15) |
| C(69) -C(70)   | 1.3900    |
| C(69) -C(74)   | 1.3900    |
| C(70) -C(71)   | 1.3900    |
| C(71) -C(72)   | 1.3900    |
| C(71) -C(75)   | 1.555(15) |
| C(72) -C(73)   | 1.3900    |
| C(73) -C(74)   | 1.3900    |
| C(73) -C(85)   | 1.530(14) |
| C(75) -C(78)   | 1.45(2)   |
| C(75) -C(76)   | 1.48(3)   |
| C(75) -C(77)   | 1.55(3)   |
| C(79) -C(80)   | 1.481(18) |
| C(81) -C(82)   | 1.453(14) |
| C(83) -C(84)   | 1.465(14) |
| C(85) -C(86)   | 1.588(14) |
| C(86) -C(87)   | 1.3900    |
| C(86) -C(91)   | 1.3900    |
| C(87) -C(88)   | 1.3900    |
| C(88) -C(89)   | 1.3900    |
| C(88) -C(92)   | 1.556(13) |
| C(89) -C(90)   | 1.3900    |
| C(90) -C(91)   | 1.3900    |
| C(90) -C(102)  | 1.548(14) |
| C(92) -C(94)   | 1.48(2)   |
| C(92) -C(95)   | 1.48(2)   |
| C(92) -C(93)   | 1.52(2)   |
| C(96) -C(97)   | 1.517(18) |
| C(98) -C(99)   | 1.481(13) |
| C(100) -C(101) | 1.471(13) |
| C(104) -C1(2)  | 1.700(14) |
| C(104) -C1(1)  | 1.703(15) |
| C(105) -C1(4)  | 1.680(16) |
| C(105) -C1(3)  | 1.700(16) |

|                     |          |
|---------------------|----------|
| O(10) -Cs(1) -O(12) | 74.2(3)  |
| O(10) -Cs(1) -O(4)  | 77.7(3)  |
| O(12) -Cs(1) -O(4)  | 139.8(3) |
| O(10) -Cs(1) -O(1)  | 118.5(2) |
| O(12) -Cs(1) -O(1)  | 116.8(2) |
| O(4) -Cs(1) -O(1)   | 101.6(2) |
| O(10) -Cs(1) -O(11) | 93.9(2)  |
| O(12) -Cs(1) -O(11) | 53.3(2)  |
| O(4) -Cs(1) -O(11)  | 157.5(2) |
| O(1) -Cs(1) -O(11)  | 63.9(2)  |
| O(10) -Cs(1) -O(2)  | 70.5(2)  |
| O(12) -Cs(1) -O(2)  | 111.7(3) |
| O(4) -Cs(1) -O(2)   | 84.4(2)  |
| O(1) -Cs(1) -O(2)   | 48.7(2)  |
| O(11) -Cs(1) -O(2)  | 73.1(2)  |
| O(10) -Cs(1) -C(6)  | 138.9(2) |

|                   |            |
|-------------------|------------|
| O(12)-Cs(1)-C(6)  | 116.2(2)   |
| O(4)-Cs(1)-C(6)   | 103.9(2)   |
| O(1)-Cs(1)-C(6)   | 20.38(18)  |
| O(11)-Cs(1)-C(6)  | 68.90(19)  |
| O(2)-Cs(1)-C(6)   | 68.89(19)  |
| O(10)-Cs(1)-C(97) | 80.3(3)    |
| O(12)-Cs(1)-C(97) | 14.5(3)    |
| O(4)-Cs(1)-C(97)  | 153.1(3)   |
| O(1)-Cs(1)-C(97)  | 102.3(2)   |
| O(11)-Cs(1)-C(97) | 38.8(2)    |
| O(2)-Cs(1)-C(97)  | 102.4(3)   |
| C(6)-Cs(1)-C(97)  | 102.8(2)   |
| O(10)-Cs(1)-I(2)  | 154.13(17) |
| O(12)-Cs(1)-I(2)  | 95.2(2)    |
| O(4)-Cs(1)-I(2)   | 97.93(19)  |
| O(1)-Cs(1)-I(2)   | 87.32(16)  |
| O(11)-Cs(1)-I(2)  | 98.41(16)  |
| O(2)-Cs(1)-I(2)   | 135.00(16) |
| C(6)-Cs(1)-I(2)   | 66.94(11)  |
| C(97)-Cs(1)-I(2)  | 95.27(19)  |
| O(10)-Cs(1)-Cl(1) | 88.00(19)  |
| O(12)-Cs(1)-Cl(1) | 70.8(2)    |
| O(4)-Cs(1)-Cl(1)  | 80.26(18)  |
| O(1)-Cs(1)-Cl(1)  | 153.32(18) |
| O(11)-Cs(1)-Cl(1) | 120.68(17) |
| O(2)-Cs(1)-Cl(1)  | 155.84(18) |
| C(6)-Cs(1)-Cl(1)  | 133.03(15) |
| C(97)-Cs(1)-Cl(1) | 83.9(2)    |
| I(2)-Cs(1)-Cl(1)  | 66.16(10)  |
| O(10)-Cs(1)-Cs(2) | 46.59(17)  |
| O(12)-Cs(1)-Cs(2) | 119.8(2)   |
| O(4)-Cs(1)-Cs(2)  | 46.81(18)  |
| O(1)-Cs(1)-Cs(2)  | 88.32(15)  |
| O(11)-Cs(1)-Cs(2) | 112.86(16) |
| O(2)-Cs(1)-Cs(2)  | 46.29(15)  |
| C(6)-Cs(1)-Cs(2)  | 104.66(12) |
| C(97)-Cs(1)-Cs(2) | 122.05(19) |
| I(2)-Cs(1)-Cs(2)  | 142.47(3)  |
| Cl(1)-Cs(1)-Cs(2) | 110.63(9)  |
| O(10)-Cs(2)-O(2)  | 72.4(2)    |
| O(10)-Cs(2)-O(4)  | 75.0(2)    |
| O(2)-Cs(2)-O(4)   | 87.2(2)    |
| O(10)-Cs(2)-O(7)  | 103.8(2)   |
| O(2)-Cs(2)-O(7)   | 107.5(2)   |
| O(4)-Cs(2)-O(7)   | 164.4(2)   |
| O(10)-Cs(2)-O(8)  | 68.4(3)    |
| O(2)-Cs(2)-O(8)   | 125.9(3)   |
| O(4)-Cs(2)-O(8)   | 115.8(3)   |
| O(7)-Cs(2)-O(8)   | 51.2(2)    |
| O(10)-Cs(2)-O(5)  | 171.8(2)   |
| O(2)-Cs(2)-O(5)   | 115.7(2)   |
| O(4)-Cs(2)-O(5)   | 105.6(2)   |
| O(7)-Cs(2)-O(5)   | 73.4(2)    |
| O(8)-Cs(2)-O(5)   | 104.6(3)   |
| O(10)-Cs(2)-O(6)  | 124.3(3)   |
| O(2)-Cs(2)-O(6)   | 149.3(3)   |
| O(4)-Cs(2)-O(6)   | 74.8(3)    |
| O(7)-Cs(2)-O(6)   | 93.9(3)    |
| O(8)-Cs(2)-O(6)   | 84.7(3)    |
| O(5)-Cs(2)-O(6)   | 49.2(2)    |



|                       |            |
|-----------------------|------------|
| O(10) - Cs(2) - O(8)  | 113.0(2)   |
| O(2) - Cs(2) - O(3)   | 72.9(2)    |
| O(4) - Cs(2) - O(3)   | 47.9(2)    |
| O(7) - Cs(2) - O(3)   | 140.8(2)   |
| O(8) - Cs(2) - O(3)   | 157.9(3)   |
| O(5) - Cs(2) - O(3)   | 71.8(2)    |
| O(6) - Cs(2) - O(3)   | 76.6(3)    |
| O(10) - Cs(2) - O(9)  | 47.5(2)    |
| O(2) - Cs(2) - O(9)   | 59.2(2)    |
| O(4) - Cs(2) - O(9)   | 118.4(2)   |
| O(7) - Cs(2) - O(9)   | 67.3(2)    |
| O(8) - Cs(2) - O(9)   | 66.8(3)    |
| O(5) - Cs(2) - O(9)   | 134.7(2)   |
| O(6) - Cs(2) - O(9)   | 151.4(3)   |
| O(3) - Cs(2) - O(9)   | 131.58(19) |
| O(10) - Cs(2) - C(29) | 91.7(3)    |
| O(2) - Cs(2) - C(29)  | 95.8(3)    |
| O(4) - Cs(2) - C(29)  | 17.1(2)    |
| O(7) - Cs(2) - C(29)  | 155.0(3)   |
| O(8) - Cs(2) - C(29)  | 120.7(3)   |
| O(5) - Cs(2) - C(29)  | 88.5(3)    |
| O(6) - Cs(2) - C(29)  | 61.1(3)    |
| O(3) - Cs(2) - C(29)  | 38.9(2)    |
| O(9) - Cs(2) - C(29)  | 135.3(3)   |
| O(10) - Cs(2) - C(63) | 85.7(3)    |
| O(2) - Cs(2) - C(63)  | 135.4(3)   |
| O(4) - Cs(2) - C(63)  | 124.6(3)   |
| O(7) - Cs(2) - C(63)  | 40.4(2)    |
| O(8) - Cs(2) - C(63)  | 17.4(3)    |
| O(5) - Cs(2) - C(63)  | 87.3(3)    |
| O(6) - Cs(2) - C(63)  | 74.7(3)    |
| O(3) - Cs(2) - C(63)  | 151.2(3)   |
| O(9) - Cs(2) - C(63)  | 77.2(3)    |
| C(29) - Cs(2) - C(63) | 123.8(3)   |
| O(10) - Cs(2) - C(80) | 16.0(2)    |
| O(2) - Cs(2) - C(80)  | 78.9(3)    |
| O(4) - Cs(2) - C(80)  | 89.7(3)    |
| O(7) - Cs(2) - C(80)  | 88.0(3)    |
| O(8) - Cs(2) - C(80)  | 54.8(3)    |
| O(5) - Cs(2) - C(80)  | 158.8(3)   |
| O(6) - Cs(2) - C(80)  | 124.6(3)   |
| O(3) - Cs(2) - C(80)  | 128.9(2)   |
| O(9) - Cs(2) - C(80)  | 38.3(2)    |
| C(29) - Cs(2) - C(80) | 105.8(3)   |
| C(63) - Cs(2) - C(80) | 71.8(3)    |
| I(3) - I(2) - I(1)    | 175.42(8)  |
| I(3) - I(2) - Cs(1)   | 94.66(6)   |
| I(1) - I(2) - Cs(1)   | 82.04(4)   |
| I(6) - I(5) - I(4)    | 174.31(5)  |
| C(6) - O(1) - C(11)   | 113.1(8)   |
| C(6) - O(1) - Cs(1)   | 110.4(5)   |
| C(11) - O(1) - Cs(1)  | 134.0(7)   |
| C(12) - O(2) - Cs(2)  | 124.0(9)   |
| C(12) - O(2) - Cs(1)  | 126.2(8)   |
| Cs(2) - O(2) - Cs(1)  | 82.8(2)    |
| C(23) - O(3) - C(28)  | 112.1(8)   |
| C(23) - O(3) - Cs(2)  | 137.1(5)   |
| C(28) - O(3) - Cs(2)  | 107.9(6)   |
| C(29) - O(4) - Cs(1)  | 145.2(9)   |
| C(29) - O(4) - Cs(2)  | 115.6(8)   |

|                   |           |
|-------------------|-----------|
| Cs(1)-O(4)-Cs(2)  | 87.9(2)   |
| C(40)-O(5)-C(45)  | 113.6(8)  |
| C(40)-O(5)-Cs(2)  | 116.5(5)  |
| C(45)-O(5)-Cs(2)  | 129.9(7)  |
| C(46)-O(6)-Cs(2)  | 129.4(10) |
| C(57)-O(7)-C(62)  | 111.4(8)  |
| C(57)-O(7)-Cs(2)  | 129.3(5)  |
| C(62)-O(7)-Cs(2)  | 118.5(7)  |
| C(63)-O(8)-Cs(2)  | 113.2(9)  |
| C(74)-O(9)-C(79)  | 110.2(8)  |
| C(74)-O(9)-Cs(2)  | 138.8(5)  |
| C(79)-O(9)-Cs(2)  | 109.3(7)  |
| C(80)-O(10)-Cs(1) | 147.3(9)  |
| C(80)-O(10)-Cs(2) | 120.1(8)  |
| Cs(1)-O(10)-Cs(2) | 88.8(2)   |
| C(91)-O(11)-C(96) | 113.4(8)  |
| C(91)-O(11)-Cs(1) | 121.7(5)  |
| C(96)-O(11)-Cs(1) | 124.3(7)  |
| C(97)-O(12)-Cs(1) | 129.7(8)  |
| C(12)-N(1)-C(13)  | 117.1(11) |
| C(12)-N(1)-C(15)  | 121.1(14) |
| C(13)-N(1)-C(15)  | 113.4(14) |
| C(12)-N(1)-C(15') | 123.4(15) |
| C(13)-N(1)-C(15') | 117.5(15) |
| C(15)-N(1)-C(15') | 42.0(11)  |
| C(29)-N(2)-C(32)  | 119.7(11) |
| C(29)-N(2)-C(30)  | 125.1(11) |
| C(32)-N(2)-C(30)  | 115.2(12) |
| C(46)-N(3)-C(49)  | 118.0(12) |
| C(46)-N(3)-C(47)  | 124.8(12) |
| C(49)-N(3)-C(47)  | 116.7(12) |
| C(63)-N(4)-C(64)  | 124.0(12) |
| C(63)-N(4)-C(66)  | 120.1(12) |
| C(64)-N(4)-C(66)  | 115.9(13) |
| C(80)-N(5)-C(81)  | 125.3(11) |
| C(80)-N(5)-C(83)  | 117.8(13) |
| C(81)-N(5)-C(83)  | 116.5(13) |
| C(97)-N(6)-C(98)  | 126.0(10) |
| C(97)-N(6)-C(100) | 118.5(11) |
| C(98)-N(6)-C(100) | 115.2(11) |
| C(2)-C(1)-C(6)    | 120.0     |
| C(2)-C(1)-C(102)  | 115.8(7)  |
| C(6)-C(1)-C(102)  | 123.2(7)  |
| C(3)-C(2)-C(1)    | 120.0     |
| C(2)-C(3)-C(4)    | 120.0     |
| C(2)-C(3)-C(7)    | 122.1(7)  |
| C(4)-C(3)-C(7)    | 117.8(7)  |
| C(5)-C(4)-C(3)    | 120.0     |
| C(4)-C(5)-C(6)    | 120.0     |
| C(4)-C(5)-C(17)   | 120.6(7)  |
| C(6)-C(5)-C(17)   | 118.2(7)  |
| O(1)-C(6)-C(5)    | 119.7(6)  |
| O(1)-C(6)-C(1)    | 120.3(6)  |
| C(5)-C(6)-C(1)    | 120.0     |
| O(1)-C(6)-Cs(1)   | 49.2(4)   |
| C(5)-C(6)-Cs(1)   | 104.6(3)  |
| C(1)-C(6)-Cs(1)   | 114.4(3)  |
| C(9)-C(7)-C(8)    | 106.0(13) |
| C(9)-C(7)-C(10)   | 108.8(14) |
| C(8)-C(7)-C(10)   | 109.3(14) |

|                    |           |
|--------------------|-----------|
| C(9)-C(7)-C(3)     | 111.8(12) |
| C(8)-C(7)-C(3)     | 113.2(12) |
| C(10)-C(7)-C(3)    | 107.7(12) |
| O(1)-C(11)-C(12)   | 108.5(10) |
| O(2)-C(12)-N(1)    | 125.1(12) |
| O(2)-C(12)-C(11)   | 120.2(12) |
| N(1)-C(12)-C(11)   | 114.6(11) |
| O(2)-C(12)-Cs(2)   | 41.1(7)   |
| N(1)-C(12)-Cs(2)   | 98.8(8)   |
| C(11)-C(12)-Cs(2)  | 135.3(8)  |
| C(14)-C(13)-N(1)   | 111.5(11) |
| C(14)-C(13)-Cs(2)  | 147.0(10) |
| N(1)-C(13)-Cs(2)   | 95.9(7)   |
| C(16)-C(15)-N(1)   | 107.7(12) |
| C(16')-C(15')-N(1) | 108.9(13) |
| C(18)-C(17)-C(5)   | 117.1(9)  |
| C(19)-C(18)-C(23)  | 120.0     |
| C(19)-C(18)-C(17)  | 121.0(6)  |
| C(23)-C(18)-C(17)  | 118.7(6)  |
| C(20)-C(19)-C(18)  | 120.0     |
| C(19)-C(20)-C(21)  | 120.0     |
| C(19)-C(20)-C(24)  | 121.9(6)  |
| C(21)-C(20)-C(24)  | 117.9(6)  |
| C(22)-C(21)-C(20)  | 120.0     |
| C(21)-C(22)-C(23)  | 120.0     |
| C(21)-C(22)-C(34)  | 119.1(7)  |
| C(23)-C(22)-C(34)  | 120.8(7)  |
| C(22)-C(23)-C(18)  | 120.0     |
| C(22)-C(23)-O(3)   | 121.1(6)  |
| C(18)-C(23)-O(3)   | 118.9(6)  |
| C(26)-C(24)-C(25)  | 107.6(12) |
| C(26)-C(24)-C(27)  | 109.5(12) |
| C(25)-C(24)-C(27)  | 109.9(12) |
| C(26)-C(24)-C(20)  | 111.1(10) |
| C(25)-C(24)-C(20)  | 110.5(10) |
| C(27)-C(24)-C(20)  | 108.1(10) |
| O(3)-C(28)-C(29)   | 108.5(11) |
| O(4)-C(29)-N(2)    | 122.0(11) |
| O(4)-C(29)-C(28)   | 121.8(12) |
| N(2)-C(29)-C(28)   | 116.3(12) |
| O(4)-C(29)-Cs(2)   | 47.3(7)   |
| N(2)-C(29)-Cs(2)   | 132.3(8)  |
| C(28)-C(29)-Cs(2)  | 91.9(7)   |
| N(2)-C(30)-C(31)   | 111.0(11) |
| N(2)-C(32)-C(33)   | 111.9(11) |
| C(35)-C(34)-C(22)  | 119.3(10) |
| C(36)-C(35)-C(40)  | 120.0     |
| C(36)-C(35)-C(34)  | 119.9(7)  |
| C(40)-C(35)-C(34)  | 120.0(7)  |
| C(35)-C(36)-C(37)  | 120.0     |
| C(38)-C(37)-C(36)  | 120.0     |
| C(38)-C(37)-C(41)  | 120.0(7)  |
| C(36)-C(37)-C(41)  | 120.0(7)  |
| C(39)-C(38)-C(37)  | 120.0     |
| C(40)-C(39)-C(38)  | 120.0     |
| C(40)-C(39)-C(51)  | 120.8(7)  |
| C(38)-C(39)-C(51)  | 119.2(7)  |
| O(5)-C(40)-C(39)   | 119.9(6)  |
| O(5)-C(40)-C(35)   | 120.1(6)  |
| C(39)-C(40)-C(35)  | 120.0     |

|                   |           |
|-------------------|-----------|
| O(5)-C(40)-Cs(2)  | 45.1(4)   |
| C(39)-C(40)-Cs(2) | 109.9(3)  |
| C(35)-C(40)-Cs(2) | 112.2(3)  |
| C(44)-C(41)-C(43) | 118(2)    |
| C(44)-C(41)-C(37) | 116.4(15) |
| C(43)-C(41)-C(37) | 113.8(16) |
| C(44)-C(41)-C(42) | 102.3(17) |
| C(43)-C(41)-C(42) | 92.6(18)  |
| C(37)-C(41)-C(42) | 109.3(14) |
| O(5)-C(45)-C(46)  | 108.4(11) |
| O(6)-C(46)-N(3)   | 123.6(14) |
| O(6)-C(46)-C(45)  | 119.3(14) |
| N(3)-C(46)-C(45)  | 117.0(13) |
| C(48)-C(47)-N(3)  | 112.4(11) |
| C(50)-C(49)-N(3)  | 111.2(11) |
| C(39)-C(51)-C(52) | 116.5(10) |
| C(53)-C(52)-C(57) | 120.0     |
| C(53)-C(52)-C(51) | 118.8(7)  |
| C(57)-C(52)-C(51) | 121.2(7)  |
| C(52)-C(53)-C(54) | 120.0     |
| C(55)-C(54)-C(53) | 120.0     |
| C(55)-C(54)-C(58) | 120.4(7)  |
| C(53)-C(54)-C(58) | 119.3(7)  |
| C(56)-C(55)-C(54) | 120.0     |
| C(55)-C(56)-C(57) | 120.0     |
| C(55)-C(56)-C(68) | 118.1(7)  |
| C(57)-C(56)-C(68) | 121.9(7)  |
| O(7)-C(57)-C(56)  | 119.2(6)  |
| O(7)-C(57)-C(52)  | 120.2(6)  |
| C(56)-C(57)-C(52) | 120.0     |
| C(59)-C(58)-C(61) | 110.8(14) |
| C(59)-C(58)-C(54) | 112.2(11) |
| C(61)-C(58)-C(54) | 112.7(12) |
| C(59)-C(58)-C(60) | 104.3(13) |
| C(61)-C(58)-C(60) | 106.7(14) |
| C(54)-C(58)-C(60) | 109.4(11) |
| O(7)-C(62)-C(63)  | 108.2(11) |
| O(8)-C(63)-N(4)   | 122.1(12) |
| O(8)-C(63)-C(62)  | 120.1(13) |
| N(4)-C(63)-C(62)  | 117.6(12) |
| O(8)-C(63)-Cs(2)  | 49.4(7)   |
| N(4)-C(63)-Cs(2)  | 139.1(9)  |
| C(62)-C(63)-Cs(2) | 87.4(7)   |
| N(4)-C(64)-C(65)  | 110.4(11) |
| C(67)-C(66)-N(4)  | 111.2(12) |
| C(69)-C(68)-C(56) | 114.5(9)  |
| C(70)-C(69)-C(74) | 120.0     |
| C(70)-C(69)-C(68) | 118.1(7)  |
| C(74)-C(69)-C(68) | 121.9(7)  |
| C(71)-C(70)-C(69) | 120.0     |
| C(70)-C(71)-C(72) | 120.0     |
| C(70)-C(71)-C(75) | 120.5(7)  |
| C(72)-C(71)-C(75) | 119.3(7)  |
| C(73)-C(72)-C(71) | 120.0     |
| C(72)-C(73)-C(74) | 120.0     |
| C(72)-C(73)-C(85) | 120.5(7)  |
| C(74)-C(73)-C(85) | 119.5(7)  |
| C(73)-C(74)-C(69) | 120.0     |
| C(73)-C(74)-O(9)  | 118.0(6)  |
| C(69)-C(74)-O(9)  | 121.9(6)  |

|                    |           |
|--------------------|-----------|
| C(78)-C(75)-C(76)  | 111.5(16) |
| C(78)-C(75)-C(77)  | 109.1(17) |
| C(76)-C(75)-C(77)  | 101.1(16) |
| C(78)-C(75)-C(71)  | 113.2(14) |
| C(76)-C(75)-C(71)  | 112.8(14) |
| C(77)-C(75)-C(71)  | 108.3(13) |
| O(9)-C(79)-C(80)   | 109.7(11) |
| O(10)-C(80)-N(5)   | 122.7(12) |
| O(10)-C(80)-C(79)  | 122.1(12) |
| N(5)-C(80)-C(79)   | 115.1(12) |
| O(10)-C(80)-Cs(2)  | 43.9(7)   |
| N(5)-C(80)-Cs(2)   | 137.8(9)  |
| C(79)-C(80)-Cs(2)  | 93.6(8)   |
| C(82)-C(81)-N(5)   | 110.6(12) |
| C(84)-C(83)-N(5)   | 109.0(12) |
| C(73)-C(85)-C(86)  | 117.8(9)  |
| C(87)-C(86)-C(91)  | 120.0     |
| C(87)-C(86)-C(85)  | 123.0(6)  |
| C(91)-C(86)-C(85)  | 117.0(6)  |
| C(86)-C(87)-C(88)  | 120.0     |
| C(87)-C(88)-C(89)  | 120.0     |
| C(87)-C(88)-C(92)  | 119.3(6)  |
| C(89)-C(88)-C(92)  | 120.1(6)  |
| C(88)-C(89)-C(90)  | 120.0     |
| C(91)-C(90)-C(89)  | 120.0     |
| C(91)-C(90)-C(102) | 119.5(7)  |
| C(89)-C(90)-C(102) | 120.2(7)  |
| O(11)-C(91)-C(90)  | 120.4(6)  |
| O(11)-C(91)-C(86)  | 119.6(6)  |
| C(90)-C(91)-C(86)  | 120.0     |
| C(94)-C(92)-C(95)  | 109.6(14) |
| C(94)-C(92)-C(93)  | 110.7(14) |
| C(95)-C(92)-C(93)  | 104.0(14) |
| C(94)-C(92)-C(88)  | 110.7(11) |
| C(95)-C(92)-C(88)  | 109.0(12) |
| C(93)-C(92)-C(88)  | 112.5(12) |
| O(11)-C(96)-C(97)  | 110.6(11) |
| O(12)-C(97)-N(6)   | 122.5(12) |
| O(12)-C(97)-C(96)  | 120.7(12) |
| N(6)-C(97)-C(96)   | 116.6(12) |
| O(12)-C(97)-Cs(1)  | 35.8(6)   |
| N(6)-C(97)-Cs(1)   | 157.9(9)  |
| C(96)-C(97)-Cs(1)  | 84.9(8)   |
| N(6)-C(98)-C(99)   | 111.8(10) |
| C(101)-C(100)-N(6) | 109.7(11) |
| C(1)-C(102)-C(90)  | 119.6(10) |
| Cl(2)-C(104)-Cl(1) | 114.7(12) |
| Cl(4)-C(105)-Cl(3) | 115.4(14) |
| C(104)-Cl(1)-Cs(1) | 80.8(7)   |

---

Symmetry transformations used to generate equivalent atoms:

Table 4. Anisotropic displacement parameters ( $\text{\AA}^2 \times 10^3$ ) for cd002.  
 The anisotropic displacement factor exponent takes the form:  
 $-2 \pi^2 [ h^2 a^2 U_{11} + \dots + 2 h k a^* b^* U_{12} ]$

|        | U11      | U22      | U33      | U23     | U13    | U12     |
|--------|----------|----------|----------|---------|--------|---------|
| Cs (1) | 45 (1)   | 55 (1)   | 31 (1)   | 0 (1)   | 13 (1) | -4 (1)  |
| Cs (2) | 46 (1)   | 51 (1)   | 28 (1)   | -4 (1)  | 12 (1) | 0 (1)   |
| I (1)  | 66 (1)   | 115 (1)  | 84 (1)   | -37 (1) | 7 (1)  | 0 (1)   |
| I (2)  | 68 (1)   | 94 (1)   | 101 (1)  | -34 (1) | 33 (1) | -3 (1)  |
| I (3)  | 111 (1)  | 297 (3)  | 127 (2)  | 48 (2)  | 59 (1) | 62 (2)  |
| I (4)  | 87 (1)   | 105 (1)  | 87 (1)   | -43 (1) | 21 (1) | -18 (1) |
| I (5)  | 60 (1)   | 79 (1)   | 98 (1)   | -50 (1) | 21 (1) | -8 (1)  |
| I (6)  | 97 (1)   | 105 (1)  | 81 (1)   | -51 (1) | 9 (1)  | 0 (1)   |
| O (1)  | 48 (5)   | 45 (5)   | 28 (5)   | -2 (4)  | 22 (4) | -4 (4)  |
| O (2)  | 39 (6)   | 56 (6)   | 61 (7)   | -18 (5) | 12 (5) | -11 (5) |
| O (3)  | 34 (5)   | 43 (5)   | 31 (5)   | 2 (4)   | 5 (4)  | -2 (4)  |
| O (4)  | 39 (6)   | 87 (7)   | 34 (6)   | 16 (5)  | 14 (4) | 7 (5)   |
| O (5)  | 32 (5)   | 60 (6)   | 21 (5)   | -10 (4) | 9 (4)  | -3 (4)  |
| O (6)  | 49 (7)   | 200 (14) | 30 (7)   | -26 (7) | 10 (5) | -6 (7)  |
| O (7)  | 33 (5)   | 41 (5)   | 43 (6)   | -6 (4)  | 7 (4)  | -8 (4)  |
| O (8)  | 53 (7)   | 86 (8)   | 89 (9)   | -44 (7) | 26 (6) | -19 (6) |
| O (9)  | 29 (5)   | 51 (6)   | 38 (5)   | 6 (4)   | 11 (4) | -10 (4) |
| O (10) | 52 (6)   | 33 (5)   | 50 (6)   | 9 (4)   | 22 (5) | 2 (4)   |
| O (11) | 38 (5)   | 57 (6)   | 17 (5)   | 4 (4)   | 7 (4)  | -4 (4)  |
| O (12) | 40 (6)   | 128 (10) | 35 (6)   | 11 (6)  | 8 (5)  | -24 (6) |
| N (1)  | 87 (10)  | 41 (7)   | 79 (10)  | -15 (7) | 52 (8) | -17 (7) |
| N (2)  | 44 (7)   | 76 (9)   | 42 (8)   | 8 (6)   | 15 (6) | 3 (6)   |
| N (3)  | 37 (7)   | 87 (9)   | 26 (7)   | -6 (6)  | -1 (5) | -17 (6) |
| N (4)  | 34 (7)   | 70 (8)   | 50 (8)   | -13 (6) | 13 (6) | -2 (6)  |
| N (5)  | 36 (7)   | 61 (8)   | 119 (12) | 40 (8)  | 29 (7) | 13 (6)  |
| N (6)  | 44 (7)   | 67 (8)   | 26 (7)   | 5 (6)   | 10 (5) | -13 (6) |
| Cl (1) | 114 (4)  | 167 (6)  | 71 (4)   | -11 (4) | -1 (3) | 26 (4)  |
| Cl (2) | 97 (5)   | 380 (14) | 139 (6)  | -48 (7) | 65 (5) | -53 (6) |
| Cl (3) | 275 (12) | 156 (7)  | 164 (9)  | -19 (6) | 37 (8) | 62 (7)  |
| Cl (4) | 170 (7)  | 195 (7)  | 107 (5)  | 20 (5)  | 63 (5) | 16 (6)  |

Table 5. Hydrogen coordinates ( $\times 10^4$ ) and isotropic displacement parameters ( $\text{\AA}^2 \times 10^3$ ) for cd002.

|        | x    | y     | z    | U(eq) |
|--------|------|-------|------|-------|
| H(2A)  | 1975 | 6075  | -455 | 47    |
| H(4A)  | 2454 | 5660  | 1196 | 57    |
| H(8A)  | 2294 | 4893  | -525 | 146   |
| H(8B)  | 1734 | 4885  | -556 | 146   |
| H(8C)  | 2048 | 4158  | -396 | 146   |
| H(9A)  | 1478 | 4783  | 289  | 126   |
| H(9B)  | 1864 | 4655  | 874  | 126   |
| H(9C)  | 1778 | 4039  | 407  | 126   |
| H(10A) | 2922 | 4757  | 412  | 154   |
| H(10B) | 2657 | 4035  | 529  | 154   |
| H(10C) | 2751 | 4696  | 960  | 154   |
| H(11A) | 1774 | 7914  | 1110 | 45    |
| H(11B) | 1561 | 8253  | 504  | 45    |
| H(13A) | 1695 | 10088 | 1872 | 78    |
| H(13B) | 1939 | 10291 | 1394 | 78    |
| H(14A) | 929  | 10246 | 1150 | 134   |
| H(14B) | 1247 | 10686 | 830  | 134   |
| H(14C) | 1214 | 10963 | 1420 | 134   |
| H(15A) | 1493 | 8393  | 1707 | 64    |
| H(15B) | 1255 | 9112  | 1883 | 64    |
| H(16A) | 638  | 8385  | 1353 | 90    |
| H(16B) | 895  | 8345  | 869  | 90    |
| H(16C) | 672  | 9099  | 1001 | 90    |
| H(15C) | 840  | 9364  | 1088 | 64    |
| H(15D) | 1020 | 8665  | 819  | 64    |
| H(16D) | 743  | 8310  | 1566 | 90    |
| H(16E) | 1127 | 8839  | 1965 | 90    |
| H(16F) | 1307 | 8142  | 1697 | 90    |
| H(17A) | 2898 | 6689  | 1775 | 50    |
| H(17B) | 2811 | 7503  | 1549 | 50    |
| H(19A) | 1846 | 6370  | 1733 | 46    |
| H(21A) | 1680 | 7462  | 3075 | 42    |
| H(25A) | 1397 | 5509  | 1928 | 91    |
| H(25B) | 1015 | 6108  | 1615 | 91    |
| H(25C) | 859  | 5496  | 1983 | 91    |
| H(26A) | 1709 | 5531  | 2924 | 93    |
| H(26B) | 1171 | 5519  | 2979 | 93    |
| H(26C) | 1539 | 6138  | 3285 | 93    |
| H(27A) | 583  | 6461  | 2523 | 111   |
| H(27B) | 743  | 7089  | 2170 | 111   |
| H(27C) | 947  | 7085  | 2829 | 111   |
| H(28A) | 3331 | 7394  | 2687 | 52    |
| H(28B) | 3369 | 8070  | 3101 | 52    |
| H(30A) | 4049 | 7709  | 3514 | 82    |
| H(30B) | 4601 | 7940  | 3618 | 82    |
| H(31A) | 4524 | 6665  | 3605 | 173   |
| H(31B) | 4730 | 6930  | 3111 | 173   |
| H(31C) | 4176 | 6704  | 2989 | 173   |
| H(32A) | 4518 | 8439  | 2248 | 85    |
| H(32B) | 4883 | 8078  | 2780 | 85    |
| H(33A) | 5016 | 9327  | 2753 | 147   |

|        |      |       |       |     |
|--------|------|-------|-------|-----|
| H(33B) | 4852 | 9121  | 3290  | 147 |
| H(33C) | 4475 | 9481  | 2767  | 147 |
| H(34A) | 2385 | 8303  | 3589  | 50  |
| H(34B) | 2697 | 8666  | 3230  | 50  |
| H(36A) | 1419 | 8629  | 3099  | 50  |
| H(38A) | 1267 | 10839 | 3005  | 47  |
| H(42A) | 103  | 9179  | 2458  | 246 |
| H(42B) | 588  | 8767  | 2448  | 246 |
| H(42C) | 461  | 9542  | 2151  | 246 |
| H(43A) | 736  | 9196  | 3750  | 286 |
| H(43B) | 799  | 8618  | 3300  | 286 |
| H(43C) | 280  | 8956  | 3257  | 286 |
| H(44A) | 604  | 10613 | 3317  | 222 |
| H(44B) | 121  | 10194 | 2996  | 222 |
| H(44C) | 449  | 10570 | 2657  | 222 |
| H(45A) | 2960 | 9577  | 3951  | 44  |
| H(45B) | 2960 | 10449 | 3904  | 44  |
| H(47A) | 3462 | 9982  | 4736  | 75  |
| H(47B) | 4022 | 9907  | 5053  | 75  |
| H(48A) | 3719 | 10991 | 5287  | 136 |
| H(48B) | 3560 | 11233 | 4652  | 136 |
| H(48C) | 4119 | 11156 | 4974  | 136 |
| H(49A) | 4450 | 10137 | 3871  | 92  |
| H(49B) | 4600 | 10406 | 4500  | 92  |
| H(50A) | 4949 | 9284  | 4438  | 167 |
| H(50B) | 4430 | 8936  | 4162  | 167 |
| H(50C) | 4571 | 9201  | 4791  | 167 |
| H(51A) | 2518 | 11198 | 3131  | 51  |
| H(51B) | 2121 | 11520 | 3395  | 51  |
| H(53A) | 1343 | 12013 | 2747  | 48  |
| H(55A) | 1431 | 12860 | 1284  | 50  |
| H(59A) | 378  | 12084 | 1874  | 122 |
| H(59B) | 205  | 12801 | 2126  | 122 |
| H(59C) | 622  | 12302 | 2505  | 122 |
| H(60A) | 1087 | 13383 | 2751  | 132 |
| H(60B) | 670  | 13854 | 2345  | 132 |
| H(60C) | 1208 | 13889 | 2291  | 132 |
| H(61A) | 551  | 12869 | 1111  | 157 |
| H(61B) | 877  | 13579 | 1296  | 157 |
| H(61C) | 351  | 13545 | 1384  | 157 |
| H(62A) | 3040 | 12057 | 2951  | 58  |
| H(62B) | 2941 | 12564 | 2412  | 58  |
| H(64A) | 3589 | 12919 | 3203  | 100 |
| H(64B) | 4162 | 13010 | 3365  | 100 |
| H(65A) | 3934 | 12537 | 4116  | 185 |
| H(65B) | 4251 | 11947 | 3907  | 185 |
| H(65C) | 3678 | 11861 | 3748  | 185 |
| H(66A) | 4383 | 12017 | 2363  | 104 |
| H(66B) | 4621 | 12440 | 2930  | 104 |
| H(67A) | 4929 | 11265 | 2970  | 232 |
| H(67B) | 4398 | 10935 | 2854  | 232 |
| H(67C) | 4637 | 11357 | 3419  | 232 |
| H(68A) | 2291 | 12860 | 1141  | 59  |
| H(68B) | 2609 | 12150 | 1356  | 59  |
| H(70A) | 1504 | 12713 | 409   | 56  |
| H(72A) | 1438 | 11077 | -703  | 60  |
| H(76A) | 624  | 12767 | -104  | 214 |
| H(76B) | 526  | 13211 | -671  | 214 |
| H(76C) | 1029 | 13299 | -206  | 214 |
| H(77A) | 1334 | 12403 | -1249 | 188 |



|        |      |       |       |     |
|--------|------|-------|-------|-----|
| H(77B) | 1315 | 13114 | -866  | 188 |
| H(77C) | 915  | 12998 | -1329 | 188 |
| H(78A) | 741  | 11440 | -1091 | 192 |
| H(78B) | 362  | 12096 | -1220 | 192 |
| H(78C) | 435  | 11626 | -669  | 192 |
| H(79A) | 3141 | 11754 | 887   | 55  |
| H(79B) | 2985 | 11337 | 305   | 55  |
| H(81A) | 4157 | 11670 | 320   | 86  |
| H(81B) | 3650 | 11939 | 388   | 86  |
| H(82A) | 4260 | 12717 | 851   | 197 |
| H(82B) | 4536 | 12051 | 1215  | 197 |
| H(82C) | 4029 | 12321 | 1282  | 197 |
| H(83A) | 4209 | 10012 | 793   | 131 |
| H(83B) | 4562 | 10677 | 762   | 131 |
| H(84A) | 4815 | 10110 | 1623  | 204 |
| H(84B) | 4303 | 10271 | 1725  | 204 |
| H(84C) | 4655 | 10931 | 1694  | 204 |
| H(85A) | 2485 | 10114 | 148   | 55  |
| H(85B) | 2328 | 10367 | -482  | 55  |
| H(87A) | 1209 | 10066 | -373  | 46  |
| H(89A) | 1091 | 7879  | -668  | 51  |
| H(93A) | 451  | 10133 | -482  | 165 |
| H(93B) | 447  | 9568  | 0     | 165 |
| H(93C) | -24  | 9671  | -510  | 165 |
| H(94A) | 453  | 9628  | -1423 | 126 |
| H(94B) | -32  | 9204  | -1429 | 126 |
| H(94C) | 418  | 8765  | -1518 | 126 |
| H(95A) | 374  | 7959  | -755  | 183 |
| H(95B) | -61  | 8426  | -656  | 183 |
| H(95C) | 415  | 8296  | -159  | 183 |
| H(96A) | 2494 | 9448  | -974  | 62  |
| H(96B) | 2658 | 8624  | -1029 | 62  |
| H(98A) | 3245 | 10060 | -1774 | 56  |
| H(98B) | 2775 | 9774  | -1623 | 56  |
| H(99A) | 2905 | 9075  | -2339 | 117 |
| H(99B) | 2967 | 8571  | -1806 | 117 |
| H(99C) | 3432 | 8864  | -1965 | 117 |
| H(10D) | 4111 | 9483  | -601  | 92  |
| H(10E) | 4028 | 9724  | -1232 | 92  |
| H(10F) | 4275 | 10722 | -644  | 156 |
| H(10G) | 3819 | 10618 | -411  | 156 |
| H(10H) | 3744 | 10858 | -1039 | 156 |
| H(10I) | 1847 | 7227  | -812  | 56  |
| H(10N) | 2356 | 7589  | -531  | 56  |
| H(10J) | 4351 | 7656  | 328   | 153 |
| H(10K) | 4263 | 8494  | 158   | 153 |
| H(10L) | 3557 | 14719 | 1963  | 199 |
| H(10M) | 3358 | 14141 | 2319  | 199 |
